# Supplementary material for: RNA editing by the host ADAR system affects the molecular evolution of the Zika virus
Source: Ecol Evol. 2017 May 15;7(12):4475–85. doi: 10.1002/ece3.3033 (PMC5478085; doi:10.1002/ece3.3033)
Supplement: Supplementary file 3 [file ECE3-7-4475-s003.pdf]

## **Supplementary Materials**

**Piontkivska, Frederick, Miyamoto and Wayne**

### **RNA editing by the host ADAR system affects the molecular evolution of the Zika virus**

**Supplementary Table 1.** GenBank accession numbers of ZIKV sequences used in the analyses, with collection and host information as per the GenBank, the Virus Pathogen Resource ([vprbrc.org](http://vprbrc.org)) and other available annotations.

**Supplementary Table 2.** Base compositions at first, second, third, and all codon positions (A), dinucleotide frequencies of NA, UN, and CG (B), and codon usages (i.e., % A-ending synonymous codons) for all 56 ZIKV genomes. These estimates for all 56 ZIKV genomes are summarized as their means and ranges (in parentheses).

**Supplementary Figure 1.** Multiple sequence alignment for the 56 ZIKV genomes. Sequences are identified with their respective GenBank accession numbers. Dashes ("-") refer to gaps, whereas "?" correspond to missing data.

Supplementary Table 1. GenBank accession numbers of ZIKV sequences used in the analyses, with collection and host information as per the GenBank, the Virus Pathogen Resource (vprbrc.org) and other available annotations.

| Part A. 56 ZIKV sequences included in the analyses |                            |                  |                       |                          |                                       | Part B. Additional 59 ZIKV sequences used in the preliminary analyses |                                                    |            |                           |                  |                                       |
|----------------------------------------------------|----------------------------|------------------|-----------------------|--------------------------|---------------------------------------|-----------------------------------------------------------------------|----------------------------------------------------|------------|---------------------------|------------------|---------------------------------------|
| GenBank accession number                           | Strain Name                | Collection Date* | GenBank Host          | Country                  | Notes                                 | GenBank accession number                                              | Strain Name                                        | Collection | GenBank Host              | Country          | Notes                                 |
| EU545988                                           | FSM                        | 06/2007          | Homo sapiens          | Micronesia               |                                       | DQ859059                                                              | MR_766                                             | 1947       | sentinel monkey           | Uganda           | Per Kuno et al. 2007                  |
| KF268948                                           | ARB13565                   | 1976             | Aedes africanus       | Central African Republic |                                       | HQ234498                                                              | MR_766                                             | 1947       | sentinel rhesus           | Uganda           |                                       |
| KF268949                                           | ARB15076                   | 1980             | Aedes opok            | Central African Republic | Per Berthet et al., 2014              | HQ234499                                                              | P6-740                                             | 1966       | Aedes aegypti             | Malaysia         |                                       |
| KF268950                                           | ARB7701                    | 1976             | Aedes africanus       | Central African Republic | Per Berthet et al., 2014              | HQ234500                                                              | Rth_30656                                          | 1968       | Homo sapiens              | Nigeria          |                                       |
| KF383115                                           | A-R1362                    | 1968             | Aedes africanus       | Central African Republic | Per Faye et al., 2014 (Suppl.Table 1) | HQ234501                                                              | ArD_41519                                          | 1984       | Aedes africanus           | Senegal          |                                       |
| KF383116                                           | ArD7117                    | 1968             | Aedes luteocephalus   | Senegal                  | Per Faye et al., 2014 (Suppl.Table 1) | JN850885                                                              | FS313025                                           | 2010       | Homo sapiens              | Cambodia         |                                       |
| KF383117                                           | ArD128000                  | 1997             | Aedes luteocephalus   | Senegal                  | Per Faye et al., 2014 (Suppl.Table 1) | KF383121                                                              | ArD158095                                          | -N/A-      | -N/A-                     | Canada           |                                       |
| KF383118                                           | ArD157995                  | 2001             | Aedes dalzielii       | Senegal                  | Per Faye et al., 2014 (Suppl.Table 1) | KF993678                                                              | PLCal_ZV                                           | 02/19/201  | Homo sapiens              | Martinique       |                                       |
| KF383119                                           | ArD158084                  | 2001             | Aedes dalzielii       | Senegal                  | Per Faye et al., 2014 (Suppl.Table 1) | KU647676                                                              | MRS_OPV_Martinique_PaR_2015                        | 12/2015    | Homo sapiens              | Thailand         |                                       |
| KU776791                                           | N/P/9/2013                 | 11/28/2013       | Homo sapiens          | French Polynesia         |                                       | KU681081                                                              | Zika virus/H.sapiens-tc/THA/2014/SV0127-14         | 07/19/201  | Homo sapiens              | Philippines      |                                       |
| KU312312                                           | Z1106033                   | 10/02/2015       | Homo sapiens          | Suriname                 |                                       | KU681082                                                              | Zika virus/H.sapiens-tc/PHU/2012/CPC-0740          | 05/09/201  | Homo sapiens              | Uganda           | Per Kuno et al. 2007                  |
| KU321639                                           | ZikaSPH2015                | 03/2015          | Homo sapiens          | Brazil                   |                                       | KU720415                                                              | MR_766                                             | 1947       | sentinel monkey           | Colombia         |                                       |
| KU365777                                           | BehH818995                 | 2015             | Homo sapiens          | Brazil                   |                                       | KU820897                                                              | FLR                                                | 12/2015    | Homo sapiens              | Italy            |                                       |
| KU365778                                           | BehH819015                 | 2015             | Homo sapiens          | Brazil                   |                                       | KU853013                                                              | Dominican Republic/2016/PD2                        | 02/01/201  | Homo sapiens              | USA              |                                       |
| KU365779                                           | BehH819966                 | 2015             | Homo sapiens          | Brazil                   |                                       | KU850770                                                              | FB-WUH-2016                                        | 02/02/201  | Homo sapiens              | Brazil           |                                       |
| KU365780                                           | BehH815744                 | 2015             | Homo sapiens          | Brazil                   |                                       | KU926309                                                              | Rio-U1                                             | 01/14/201  | Homo sapiens              | Brazil           |                                       |
| KU497555                                           | Brazil-ZKV2015             | 11/30/2015       | Homo sapiens          | Brazil                   |                                       | KU926310                                                              | Rio-S1                                             | 01/29/201  | Homo sapiens              | Suriname         |                                       |
| KU501215                                           | PRVABC59                   | 12/01/2015       | Homo sapiens          | Puerto Rico              |                                       | KU937936                                                              | ZIKVNL00013                                        | 02/11/201  | Homo sapiens              | Senegal          |                                       |
| KU501216                                           | 103344                     | 12/01/2015       | Homo sapiens          | Guatemala                |                                       | KU955591                                                              | Zika virus/A.africanus-tc/SEN/1984/41525-DAX       | 11/20/198  | Aedes africanus           | Senegal          |                                       |
| KU501217                                           | 8375                       | 11/01/2015       | Homo sapiens          | Guatemala                |                                       | KU955592                                                              | Zika virus/A.taylori-tc/SEN/1984/41662-DAX         | 12/06/198  | Aedes taylori             | Senegal          |                                       |
| KU509998                                           | Haiti/1225/201             | 12/12/2014       | Homo sapiens          | Haiti                    |                                       | KU955593                                                              | Zika virus/H.sapiens-tc/RHM/2010/FS313025          | 2010       | Homo sapiens              | Cambodia         |                                       |
| KU527068                                           | Natal RGN                  | 2015             | Homo sapiens          | Brazil                   |                                       | KU955594                                                              | Zika virus/M.mulatta-tc/UGA/1947/MR-766            | 04/1947    | Macaca mulatta            | Uganda           |                                       |
| KU707826                                           | SSABR1                     | 07/01/2015       | Homo sapiens          | Brazil                   |                                       | KU955595                                                              | Zika virus/A.taylori-tc/SEN/1984/41671-DAX         | 12/14/198  | Aedes taylori             | Senegal          |                                       |
| KU729217                                           | BehH823339                 | 2015             | Homo sapiens          | Brazil                   |                                       | KU963573                                                              | ZIKV/Macaca mulatta/UGA/MR-766_SM150-V8/1947       | 04/20/194  | Macaca mulatta            | Uganda           |                                       |
| KU729218                                           | BehH828305                 | 2015             | Homo sapiens          | Brazil                   |                                       | KU963574                                                              | ZIKV/Homo sapiens/NGA/IbH-30656_SM21V1-V3/1968     | 09/09/196  | Homo sapiens              | Nigeria          |                                       |
| KU740184                                           | GZ01                       | 02/2016          | Homo sapiens          | China                    |                                       | KU963796                                                              | S2-WN01                                            | 2016       | Homo sapiens              | China            |                                       |
| KU744693                                           | VE_Ganxian                 | 02/06/2016       | Homo sapiens          | China                    |                                       | KO051563                                                              | Haiti/1/2016                                       | 02/05/201  | Homo sapiens              | USA              |                                       |
| KU758877                                           | 17271                      | 12/2015          | Homo sapiens          | French Guiana            |                                       | KO087101                                                              | ZIKV/Homo sapiens/PR/PRVABC59/2015                 | 12/2015    | Homo sapiens              | Puerto Rico      |                                       |
| KU761564                                           | GDZ16001                   | 02/12/2016       | Homo sapiens          | China                    |                                       | KO087102                                                              | ZIKV/Homo sapiens/COL/FLR/2015                     | 12/2015    | Homo sapiens              | Colombia         |                                       |
| KU820898                                           | GZ01                       | 02/14/2016       | Homo sapiens          | China                    |                                       | KU156774                                                              | ZIKV/Homo sapiens/PAN/CDC-259359_V1-V3/2015        | 12/18/201  | Homo sapiens              | Panama           |                                       |
| KU820899                                           | Z203                       | 02/17/2016       | Homo sapiens          | China                    |                                       | KU156775                                                              | ZIKV/Homo sapiens/PAN/CDC-259249_V1-V3/2015        | 12/11/201  | Homo sapiens              | Panama           |                                       |
| KU853012                                           | Dominican Rep              | 02/01/2016       | Homo sapiens          | Italy                    |                                       | KU156776                                                              | ZIKV/Homo sapiens/PAN/CDC-259364_V1-V2/2015        | 12/18/201  | Homo sapiens              | Panama           |                                       |
| KU866423                                           | Zika virus/SZ01.2016       |                  | Homo sapiens          | China                    |                                       | KU197192                                                              | ZIKV/H.sapiens/Brazil/PE243/2015                   | 2015       | Homo sapiens              | Brazil           |                                       |
| KU922923                                           | MEX/InDRE/Lm 02/25/2016    |                  | Homo sapiens          | Mexico                   |                                       | KU981334                                                              | ZIKV/Aedes africanus/SEN/DAK-AR-41524_A1C1-V2/1984 | 11/17/198  | Aedes africanus           | Senegal          |                                       |
| KU922960                                           | MEX/InDRE/Sn 02/25/2016    |                  | Homo sapiens; female  | Mexico                   |                                       | KU981335                                                              | ZIKV/Homo sapiens/PAN/BEI-259634_V4/2016           | 2016       | Homo sapiens              | Panama           |                                       |
| KU940224                                           | Bahia09                    | 08/01/2015       | Homo sapiens          | Brazil                   |                                       | KU247632                                                              | MEX_1_7                                            | 11/2015    | Homo sapiens              | Mexico           |                                       |
| KU940228                                           | Bahia07                    | 07/01/2015       | Homo sapiens          | Brazil                   |                                       | KU253996                                                              | ZK2/2016                                           | 02/16/201  | Homo sapiens              | China            |                                       |
| KU955589                                           | Z16006                     | 02/16/2016       | Homo sapiens          | China                    |                                       | KU266255                                                              | ZIKV_SMGC-1                                        | 02/14/201  | Homo sapiens              | China            |                                       |
| KU955590                                           | Z16019                     | 02/26/2016       | Homo sapiens          | China                    |                                       | KU377335                                                              | MR-766                                             | 04/1947    | Macaca mulatta (monkey)   | Uganda           |                                       |
| KU991811                                           | Brazil/2016/IN 03/06/2016  |                  | Homo sapiens          | Italy                    |                                       | KU446950                                                              | ZIKV/Aedes.sp/MEX/MEX_2-81/2016                    | 01/01/201  | Aedes sp.                 | Mexico           |                                       |
| KX054898                                           | Zika virus/GZ01/02/25/2016 |                  | Homo sapiens          | China                    |                                       | KU446951                                                              | ZIKV/Aedes.sp/MEX/MEX_1-7/2016                     | 01/01/201  | Aedes sp.                 | Mexico           |                                       |
| KX117076                                           | ZhejiangD4                 | 02/17/2016       | Homo sapiens          | China                    |                                       | KX447509                                                              | 1_0087_FF                                          | 12/2013    | Homo sapiens              | French Polynesia |                                       |
| KX185891                                           | Zika virus/CN/5.02/17/2016 |                  | Homo sapiens          | China                    |                                       | KX447510                                                              | 1_0049_FF                                          | 12/2013    | Homo sapiens              | French Polynesia |                                       |
| KX247646                                           | Zika virus/Hom 02/09/2016  |                  | Homo sapiens          | Colombia                 |                                       | KX447511                                                              | 1_0015_FF                                          | 01/2014    | Homo sapiens              | French Polynesia |                                       |
| KX262887                                           | 103451                     | 01/06/2016       | Homo sapiens          | Honduras                 |                                       | KX447512                                                              | 1_0181_FF                                          | 12/2013    | Homo sapiens              | French Polynesia |                                       |
| KX280026                                           | Parabida_01                | 2015             | Homo sapiens          | Brazil                   |                                       | KX447513                                                              | 1_0134_FF                                          | 12/2013    | Homo sapiens              | French Polynesia |                                       |
| KX365547                                           | PF131251013-1              | 10/25/2013       | Homo sapiens          | French Polynesia         |                                       | KX447514                                                              | 1_0035_FF                                          | 01/2014    | Homo sapiens              | French Polynesia |                                       |
| KX377336                                           | P6-740                     | 07/1966          | Aedes aegypti (mosqu) | Malaysia                 |                                       | KX447515                                                              | 1_0030_FF                                          | 11/2013    | Homo sapiens              | French Polynesia |                                       |
| KX377337                                           | PRVABC-59                  | 12/2015          | Homo sapiens          | Puerto Rico              |                                       | KX447516                                                              | 1_0111_FF                                          | 01/2014    | Homo sapiens              | French Polynesia |                                       |
| KX548902                                           | ZIKV/COL/FCCO 10/07/2015   |                  | Homo sapiens          | Colombia                 |                                       | KX447517                                                              | 1_0038_FF                                          | 01/2014    | Homo sapiens              | French Polynesia |                                       |
| KX601166                                           | ZIKV/Aedes afr 11/17/1984  |                  | Aedes africanus       | Senegal                  |                                       | KX520666                                                              | HS-2015-BA-01                                      | 08/2015    | Homo sapiens; female      | Brazil           |                                       |
| KX601167                                           | ZIKV/Aedes sp.             | 07/14/1966       | Aedes sp.             | Malaysia                 |                                       | KX601169                                                              | ZIKV/Macaca mulatta/UGA/MR-766/1947                | 04/20/194  | Macaca mulatta            | Uganda           |                                       |
| KX601168                                           | ZIKV/Homo sag 12/01/2015   |                  | Homo sapiens          | Puerto Rico              |                                       | KX673530                                                              | PHF_samen_Guadeloupe                               | 04/21/201  | Homo sapiens              | United King      | Per Atkinson et al., 2016             |
| KX766028                                           | R114916                    | 06/06/2016       | Homo sapiens          | Dominican Republic       |                                       | KX694532                                                              | ZIKV/Homo sapiens/THA/PLCal_ZV/2013                | 02/12/201  | Homo sapiens; female      | Thailand         |                                       |
| KX766029                                           | R116265                    | 06/23/2016       | Homo sapiens          | Mexico                   |                                       | KX694533                                                              | ZIKV/Aedes aegypti/MYS/P6-740/1966                 | 07/14/196  | Aedes sp.                 | Malaysia         |                                       |
| NC_012532                                          | MR_766                     | 1947             | sentinel monkey       | Uganda                   | Per Kuno et al. 2007                  | KX694534                                                              | ZIKV/Homo sapiens/HND/R103451/2015                 | 01/06/201  | Homo sapiens              | Honduras         |                                       |
|                                                    |                            |                  |                       |                          |                                       | KX702400                                                              | Zika virus/Homo sapiens/VEN/UF-1/2016              | 03/25/201  | Homo sapiens; lactating f | Venezuela        |                                       |
|                                                    |                            |                  |                       |                          |                                       | KO025220                                                              | -N/A-                                              | -N/A-      | -N/A-                     | Uganda           |                                       |
|                                                    |                            |                  |                       |                          |                                       | KF383120                                                              | ArD142623                                          | 2000       | Anopheles coustani        | Senegal          | Per Faye et al., 2014 (Suppl.Table 1) |

\* Collection date is given as per the respective GenBank record; and if no information is available, then other sources are used.

Atkinson, B., V. Grünwald, R. W. Miles, K. Lewandowski, S. D. Dowell, S. T. Pullon and R. Newson (2016). "Complete Genome Sequence of Zika Virus Isolated from Semen." *Genome Announc* 4(5).

Berthet, N., E. Nakoune, B. Kamgang, B. Selekon, S. Descamps-Declercq, A. Gessain, J. C. Manuguerra and M. Kasanj (2014). "Molecular characterization of three Zika flaviviruses obtained from sylvatic mosquitoes in the Central African Republic." *Vector Borne Zoonotic Dis* 14(12): 862-865.

Faye, O., C. Freire, A. Iamarino, J. V. de Oliveira, P. M. Zanotto and A. A. Sall (2014). "Molecular evolution of Zika virus during its emergence in the 20(th) century." *PLoS Negl Trop Dis* 8(1): e2636.

Kuno, G. and G. J. Chang (2007). "Full-length sequencing and genomic characterization of Bagaza, Keduogou, and Zika viruses." *Arch Virol* 152(4): 687-696.

Supplementary Table 2

Base compositions at first, second, third, and all codon positions (A), dinucleotide frequencies of NA, UN, and CG (B), and codon usages (i.e., %A-ending synonymous codons) for all 56 ZIKV genomes. These estimates for all 56 ZIKV genomes are summarized as their means and ranges (in parentheses).

A) Base compositions

| First codon position   |                        |                        |                        |                       | Second codon position  |                        |                        |                        |                       | Third codon position   |                        |                        |                        |                       | All codon positions    |                        |                        |                        |                       |
|------------------------|------------------------|------------------------|------------------------|-----------------------|------------------------|------------------------|------------------------|------------------------|-----------------------|------------------------|------------------------|------------------------|------------------------|-----------------------|------------------------|------------------------|------------------------|------------------------|-----------------------|
| U                      | C                      | A                      | G                      | %R                    | U                      | C                      | A                      | G                      | %R                    | U                      | C                      | A                      | G                      | %R                    | U                      | C                      | A                      | G                      | %R                    |
| 0.163<br>(0.160-0.164) | 0.172<br>(0.169-0.173) | 0.305<br>(0.304-0.307) | 0.360<br>(0.359-0.364) | 66.5%<br>(66.4-66.8%) | 0.285<br>(0.283-0.287) | 0.229<br>(0.227-0.230) | 0.265<br>(0.264-0.266) | 0.222<br>(0.220-0.223) | 48.6%<br>(48.5-48.7%) | 0.198<br>(0.195-0.205) | 0.255<br>(0.244-0.258) | 0.254<br>(0.249-0.267) | 0.293<br>(0.282-0.298) | 54.7%<br>(54.5-55.3%) | 0.215<br>(0.214-0.218) | 0.219<br>(0.214-0.220) | 0.275<br>(0.273-0.279) | 0.292<br>(0.288-0.294) | 56.6%<br>(56.5-56.9%) |

B) Dinucleotide frequencies

| AA                  | CA                  | CG                  | GA                  | UA                  | UC                  | UG                  | UU                  |
|---------------------|---------------------|---------------------|---------------------|---------------------|---------------------|---------------------|---------------------|
| 0.074 (0.071-0.075) | 0.078 (0.077-0.081) | 0.028 (0.023-0.029) | 0.089 (0.088-0.093) | 0.031 (0.030-0.032) | 0.048 (0.046-0.048) | 0.089 (0.088-0.092) | 0.046 (0.045-0.049) |

C) Codon usages

| Codon sets | %A-ending synonymous codons |
|------------|-----------------------------|
| NUR        | 21.6% (20.5-22.8%)          |
| NCR        | 76.4% (73.2-81.9%)          |
| NAR        | 46.9% (42.1-48.2%)          |
| NGR        | 59.0% (57.2-66.7%)          |
| Totals     | 50.9% (49.7-53.7%)          |



Sequence

[illegible]

Sequence

[illegible]

[illegible]

[illegible]

[illegible]

[illegible][illegible]

[illegible]

KX601166 ACUGUUGUGGUUUCUGGGGAGCCAGAGGGAGCUGUUCACAGGGCCUCGCGUGGAGCUUUGGAGGCGUGAGAUGGAUGGUGCAAAGGGAAGGCUAUUCUCUGGCCAUUUGAAAUGCGCGCUAAAAUUGGACAACGCUUAGAGUUGAAGGGUGUGUCAUAUUCUUGUGUACCGCAGCGUUCACAUA  
 KX601167 ACUCUGUGGUUUUCUAGGAGGUCUCAAAGAGGAGCCUUCACACGGCCUUCUGUGGAGCCUUGGAGGCGUGAGAUGGUGGCAAAAGGGAAGGCGUCCUCUGGCCCAUUGAAUUGCGUGAAAUUGGACAACGCUUAGAUUGAAGGGCGUGUCAUACUCCUUAUUGACCGCGCGUUCACAUA  
 KX601168 ACUGUCUGGUUUUUCUAGGAGGUCUCAAAGAGGAGCCUUCACACGGCCUUCUGUGGAGCUCUUGGAGGCGUGAGAUGGUGGCAAAAGGGAAGGCGUCCUUGGCGCCCAUUGAAUUGCGUGAAAUUGGACAACGCUUAGAUUGAAGGGCGUGUCAUACUCCUUAUUGACCGCGCGUUCACAUA



Sequence

Sequence

|          |                                                                                                                                                                                            |
|----------|--------------------------------------------------------------------------------------------------------------------------------------------------------------------------------------------|
| KF383115 | UGAUCUCCUCUCCACGGCGUGUUCUGCUGAUGUGGGGUGUCUGGGGACUUCUCAAAAAGAGAAACGAGAUUGGCGACGGGGGUGUUCGUCUACAAGUACGUGUAGAGCCUGGAGGGGAUAGGUACAAGUACCAUCCUGACUCCCCCGCAGAUUGGCGAGCAGCAGUCAAGCAGGCUUGGGA      |
| EU545988 | UGAUCUUUUUUACCAACGCGGUCUUCGUGAUGUGGGGUGUCUGGGGACUUCUCAAAGAAGAAACGAGAUUGGCGGUAACGGGGGUGUUCGUCUUAUACGCGUUGAAGCCUUGGAGGACAGGUACAAGUACCAUCCUGACUCCCCCGUAGUUGGCGAGCAGCAGUCAAGCAAGCAGCGGGR       |
| KU955588 | UGAUCUUCUUAUACCAACGCGGUCUUCGUGAUGUGGGGUGUCUGGGGACUUCUCAAAAAGAAGAGACGAGAUUGGCGGUAACGGGGGUGUUCGUCUUAUACGAGCUGUAGAGCCUUGGAGGACAGGUACAAGUACAUCUCCUGACUCCCCCGUAGUUGGCGAGCAGCAGUCAAGCAAGCAGCGGGA |

**Sequence**

[illegible]

|           |                                                                                                                                                                                               |
|-----------|-----------------------------------------------------------------------------------------------------------------------------------------------------------------------------------------------|
| KX548902  | AG AUGGUAUCUCGCGGGAUCCUCUCUGUUUCAAGAAUAACAAACAUCAGUGGAGAACAGUAGAAAGGGGAGCUCACACGAAUCCUGGAGAGAAUGAGAUUCAAUCAGACGGUCGUUGUGGGAUCUGUAAAAAACCCCAUGUGGAGAGACACACAGAAUUGCCCGUGCCUGUGAACAGAGCUG       |
| KX601166  | AGAGGGGAUUUGUGGGAUCCUCUCUGUUUCAAGAAUAGGAAACAUCAGUGGAAACAGUGGAAAGGGGAGCUAAAGAAACCUAGACAGGAGAAUGGAGAUUCAAUCAGACAGCUGUAGUGGGGAUCUGUAAAAAACCCCAUUGGAGAGGUCUCCACAGAAUUGCCACAGUCGUGUGAACAGAGCUG     |
| KX601167  | AGAGGGGAUUUGUGGGAUCCUCUCUGUUUCAAGAAUAGGAAACAUCUUAUGUGGAGAUCAUGUAGAAAGGGGAGCUCACGCAAAUCCUGGAGAGAAUUGGAUUAUCAAUCAGCGGUCGUUGUGGGGAUCUGUAAAAAACCCCAUUGGAGAGGUCUCCGACAGGAGUUGCCUGGCCUGUGAAUAGAGCUG |
| KX601168  | AG AUGGUAUCUCGCGGGAUCCUCUCUGUUUCAAGAAUAGGAAACAUCAGUGGAGAUCAUGUAGAAAGGGGAGCUCACGCAAAUCCUGGAGAGAAUUGGAUUAUCAAUCAGACAGCUGUUGUGGGGAUCUGUAAAAAACCCCAUUGGAGAGGUCUCCACAGAAUUGCCCGUGCCUGUAGACAGAGCUG  |
| KX7760208 | AG AUGGUAUCUCGCGGGAUCCUCUCUGUUUCAAGAAUAGGAAACAUCAGUGGAGAUCAUGUAGAAAGGGGAGCUCACGCAAAUCCUGGAGAGAAUUGGAUUAUCAAUCAGCGGUCGUUGUGGGGAUCUGUAAAAAACCCCAUUGGAGAGGUCUCCACAGAAUUGCCCGUGCCUGUAGAACAGAGCUG  |
| KX7760209 | AG AUGGUAUCUCGCGGGAUCCUCUCUGUUUCAAGAAUAGGAAACAUCAGUGGAGAUCAUGUAGAAAGGGGAGCUCACGCAAAUCCUGGAGAGAAUUGGAUUAUCAAUCAGCGGUCGUUGUGGGGAUCUGUAAAAAACCCCAUUGGAGAGGUCUCCACAGAAUUGCCCGUGCCUGUAGAACAGAGCUG  |
| KU9402024 | AG AUGGUAUCUCGCGGGAUCCUCUCUGUUUCAAGAAUAGGAAACAUCAGUGGAGAUCAUGUAGAAAGGGGAGCUCACGCAAAUCCUGGAGAGAAUUGGAUUAUCAAUCAGACGGUCGUUGUGGGGAUCUGUAAAAAACCCCAUUGGAGAGGUCUCCACAGAAUUGCCCGUGCCUGUAGAACAGAGCUG |

[illegible][illegible]

[illegible][illegible]

[illegible]

[illegible]

|          |                                                                                                                                                                                        |
|----------|----------------------------------------------------------------------------------------------------------------------------------------------------------------------------------------|
| 8B66423  | GAUCAACUGAUCACAUGGAUACAUUUCUCCUUGGAGUUGUGUAUUCUGCUCAUUGGUGCAGGAAGGGGCUGAAGAAGAGAAUGACCAAAAGAUCAUCAUAAGCAUCAUCAUUGGCAGUGGUGGAGCUAUGAUCCUGGGAGGAUUUCAAUGAGUGACCCUGGCUAAGCUGGCAAUUUUGAU   |
| KX377336 | GAUCAACUGAUCACAUGGAUACAUUUCUCCUUGGAGUGCUGUGAUUUCUGCUCAUUGGUGCAGGAAGGGGCUGAAGAAGAGAAUGACCAAAAGAUCAUCAUAAGCAUCAUCAUUGGCAGUGGUGGAGCUAUGAUCCUGGGAGGAUUUCAAUGAGUGACCCUGGCUAAGCUGGCAAUUUUGAU |
| KX377337 | GAUCAACUGAUCACAUGGAUACAUUUCUCCUUGGAGUGCUGUGAUUUCUGCUCAUUGGUGCAGGAAGGGGCUGAAGAAGAGAAUGACCAAAAGAUCAUCAUAAGCAUCAUCAUUGGCAGUGGUGGAGCUAUGAUCCUGGGAGGAUUUCAAUGAGUGACCCUGGCUAAGCUGGCAAUUUUGAU |
| KX369547 | GAUCAACUGAUCACAUGGAUACAUUUCUCCUUGGAGUGCUGUGAUUUCUGCUCAUUGGUGCAGGAAGGGGCUGAAGAAGAGAAUGACCAAAAGAUCAUCAUAAGCAUCAUCAUUGGCAGUGGUGGAGCUAUGAUCCUGGGAGGAUUUCAAUGAGUGACCCUGGCUAAGCUGGCAAUUUUGAU |
| KX548902 | GAUCAACUGAUCACAUGGAUACAUUUCUCCUUGGAGUGCUGUGAUUUCUGCUCAUUGGUGCAGGAAGGGGCUGAAGAAGAGAAUGACCAAAAGAUCAUCAUAAGCAUCAUCAUUGGCAGUGGUGGAGCUAUGAUCCUGGGAGGAUUUCAAUGAGUGACCCUGGCUAAGCUGGCAAUUUUGAU |
| KX601166 | GAUCAACCGAUCAUUUGGAUACAUUUCUCCUUGGAGUGCUGUGAUUUCACUACUUGGUGCAGGAAGGGUUGAAGAAGAGAAUGACCAAAAGAUCAUUAAGCAUCAUCAUUGGCAGUGGUGGAGCUAUGAUCCUGGGAGGAUUUCAAUGAGUGACCCUGGCUAAGCUGGCAAUUUUGAU     |
| KX601167 | GAUCAACUGAUCACAUGGAUACAUUUCUCCUUGGAGUGCUGUGAUUUCUGCUCAUUGGUGCAGGAAGGGGCUGAAGAAGAGAAUGACCAAAAGAUCAUCAUAAGCAUCAUCAUUGGCAGUGGUGGAGCUAUGAUCCUGGGAGGAUUUCAAUGAGUGACCCUGGCUAAGCUGGCAAUUUUGAU |
| KX601168 | GAUCAACUGAUCACAUGGAUACAUUUCUCCUUGGAGUGCUGUGAUUUCUGCUCAUUGGUGCAGGAAGGGGCUGAAGAAGAGAAUGACCAAAAGAUCAUCAUAAGCAUCAUCAUUGGCAGUGGUGGAGCUAUGAUCCUGGGAGGAUUUCAAUGAGUGACCCUGGCUAAGCUGGCAAUUUUGAU |
| KX776028 | GAUCAACUGAUCACAUGGAUACAUUUCUCCUUGGAGUGCUGUGAUUUCUGCUCAUUGGUGCAGGAAGGGGCUGAAGAAGAGAAUGACCAAAAGAUCAUCAUAAGCAUCAUCAUUGGCAGUGGUGGAGCUAUGAUCCUGGGAGGAUUUCAAUGAGUGACCCUGGCUAAGCUGGCAAUUUUGAU |
| KX776029 | GAUCAACUGAUCACAUGGAUACAUUUCUCCUUGGAGUGCUGUGAUUUCUGCUCAUUGGUGCAGGAAGGGGCUGAAGAAGAGAAUGACCAAAAGAUCAUCAUAAGCAUCAUCAUUGGCAGUGGUGGAGCUAUGAUCCUGGGAGGAUUUCAAUGAGUGACCCUGGCUAAGCUGGCAAUUUUGAU |
| KU940224 | GAUCAACUGAUCACAUGGAUACAUUUCUCCUUGGAGUGCUGUGAUUUCUGCUCAUUGGUGCAGGAAGGGGCUGAAGAAGAGAAUGACCAAAAGAUCAUCAUAAGCAUCAUCAUUGGCAGUGGUGGAGCUAUGAUCCUGGGAGGAUUUCAAUGAGUGACCCUGGCUAAGCUGGCAAUUUUGAU |

[illegible][illegible][illegible]

[illegible][illegible][illegible]

|           |                                                                                                                                                                                           |
|-----------|-------------------------------------------------------------------------------------------------------------------------------------------------------------------------------------------|
| NC_012532 | UCCUCUCUCCUGAAGGAAAAGGAGUGUGAAGAAGAACCCUCCAAUUUGUCAUGGCCCUGGGAUUAGACAGCUGUGAGGGUAGUAGACCCUAAUUAUUGUGGUGAGGACUACUGUUAUCUCACAAGGAGUGGGAAGCGGAGCUGGCCCCUAGUGAAGUUCUCACAGCCGUGUGGCCUGAUUAGCGC |
| KU922960  | UCCUCUCUCUGAAGGAAAAGGAGUGUGAAGAAGAACCUAACAAUUUGUCAUGGCCCUGGGACUAAACCGUGUGAGGCCUGGUGCGACCCCAUACACGUGGUGGGACUGCGUUGUCUCAACAAGAGUGGGAAGCGGAGCUGGCCCCUAGCGGAAGUACUCACAGCUGUUGGCCUGAUUAGCGC    |
| KU922960  | UCCUCUCUGAAGGAAAAGGAGCUGUGAAGAAGAACCUAACAAUUUGUCAUGGCCCUGGGACUAAACCGUGUGAGGCCUGGUGCGACCCCAUACACGUGGUGGGACUGCGUUGUCUCAACAAGAGUGGGAAGCGGAGCUGGCCCCUAGCGGAAGUACUCACAGCUGUUGGCCUGAUUAGCGC     |
| KU820898  | UCCUCUCUCUGAAGGAAAAGGAGCUGUGAAGAAGAACCUAACAAUUUGUCAUGGCCCUGGGACUAAACCGUGUGAGGCCUGGUGCGACCCCAUACACGUGGUGGGACUGCGUUGUCUCAACAAGAGUGGGAAGCGGAGCUGGCCCCUAGCGGAAGUACUCACAGCUGUUGGCCUGAUUAGCGC   |
| KU321639  | UCCUCUCUGAAGGAAAAGGAGCUGUGAAGAAGAACCUAACAAUUUGUCAUGGCCCUGGGACUAAACCGUGUGAGGCCUGGUGCGACCCCAUACACGUGGUGGGCUGCGUUGUCUCAACAAGGAGUGGGAAGCGGAGCUGGCCCCUAGCGGAAGUACUCACAGCUGUUGGCCUGAUUAGCGC     |
| KU820899  | UCCUCUCUGAAGGAAAAGGAGCUGUGAAGAAGAACCUAACAAUUUGUCAUGGCCCUGGGACUAAACCGUGUGAGGCCUGGUGCGACCCCAUACACGUGGUGGGACUGCGUUGUCUCAACAAGAGUGGGAAGCGGAGCUGGCCCCUAGCGGAAGUACUCACAGCUGUUGGCCUGAUUAGCGC     |
| KU853012  | UCCUCUCUCUGAAGGAAAAGGAGCUGUGAAGAAGAACCUAACAAUUUGUCAUGGCCCUGGGACUAAACCGUGUGAGGCCUGGUGCGACCCCAUACACGUGGUGGGACUGCGUUGUCUCAACAAGAGUGGGAAGCGGAGCUGGCCCCUAGCGGAAGUACUCACAGCUGUUGGCCUGAUUAGCGC   |
| KU721217  | UCCUCUCUCUGAAGGAAAAGGAGCUGUGAAGAAGAACCUAACAAUUUGUCAUGGCCCUGGGACUAAACCGUGUGAGGCCUGGUGCGACCCCAUACACGUGGUGGGACUGCGUUGUCUCAACAAGAGUGGGAAGCGGAGCUGGCCCCUAGCGGAAGUACUCACAGCUGUUGGCCUGAUUAGCGC   |
| KU721218  | UCCUCUCUCUGAAGGAAAAGGAGCUGUGAAGAAGAACCUAACAAUUUGUCAUGGCCCUGGGACUAAACCGUGUGAGGCCUGGUGCGACCCCAUACACGUGGUGGGACUGCGUUGUCUCAACAAGGAGUGGGAAGCGGAGCUGGCCCCUAGCGGAAGUACUCACAGCUGUUGGCCUGAUUAGCGC  |
| KU716154  | UCCUCUCUCUGAAGGAAAAGGAGCUGUGAAGAAGAACCUAACAAUUUGUCAUGGCCCUGGGACUAAACCGUGUGAGGCCUGGUGCGACCCCAUACACGUGGUGGGACUGCGUUGUCUCAACAAGAGUGGGAAGCGGAGCUGGCCCCUAGCGGAAGUACUCACAGCUGUUGGCCUGAUUAGCGC   |
| KU740184  | UCCUCUCUCUGAAGGAAAAGGAGCUGUGAAGAAGAACCUAACAAUUUGUCAUGGCCCUGGGACUAAACCGUGUGAGGCCUGGUGCGACCCCAUACACGUGGUGGGACUGCGUUGUCUCAACAAGAGUGGGAAGCGGAGCUGGCCCCUAGCGGAAGUACUCACAGCUGUUGGCCUGAUUAGCGC   |

[illegible]

[illegible]

XA247646 GCGCUAGAUGAGAGUGUGGAUUUUCCUCUGUGGAGGAUGACGUGUCCCCCAUGAGAGAGAUCAUACUCAAGGUGGUCCUGAUGACCAUCUGUGGCAUGAACCCAAUAGCCAUAACCCUUUGCAGCUGGAGCGUGGUACGUUAUACGUGUAGACUGGAAAGAGAGUGGUGCGCUAUGGGAUG  
 KX262807 GCGCUAGAUGAGAGUGUGGAUUUUCCUCUGUGGAGGAUGACGUGUCCCCCAUGAGAGAGAUCAUACUCAAGGUGGUCCUGAUGACCAUCUGUGGCAUGAACCCAAUAGCCAUAACCCUUUGCAGCUGGAGCGUGGUACGUUAUACGUGUAGACUGGAAAGAGAGUGGUGUCUUAUGGGAUG  
 KX280026 GCGCUAGAUGAGAGUGUGGAUUUUCCUCUGUGGAGGAUGACGUGUCCCCCAUGAGAGAGAUCAUACUCAAGGUGGUCCUGAUGACCAUCUGUGGCAUGAACCCAAUAGCCAUAACCCUUUGCAGCUGGAGCGUGGUACGUUAUACGUGUAGACUGGAAAGAGAGUGGUGUCUUAUGGGAUG  
 KU758647 GCGCUAGAUGAGAGUGUGGAUUUUCCUCUGUGGAGGAUGACGUGUCCCCCAUGAGAGAGAUCAUACUCAAGGUGGUCCUGAUGACCAUCUGUGGCAUGAACCCAAUAGCCAUAACCCUUUGCAGCUGGAGCGUGGUACGUUAUACGUGUAGACUGGAAAGAGAGUGGUGUCUUAUGGGAUG  
 KU866243 GCGCUAGAUGAGAGUGUGGAUUUUCCUCUGUGGAGGAUGACGUGUCCCCCAUGAGAGAGAUCAUACUCAAGGUGGUCCUGAUGACCAUCUGUGGCAUGAACCCAAUAGCCAUAACCCUUUGCAGCUGGAGCGUGGUACGUUAUACGUGUAGACUGGAAAGAGAGUGGAGUCUUAUGGGAUG  
 KX377336 GCACUAGAUGAGAGUGUGGAUUUUCCUCUGUGGAGGAUGAUGUCCCCCAUGAGAGAGAUCAUACUCAAGGUGGUCCUGAUGACCAUCUGUGGCAUGAACCCAAUAGCCAUAACCCUUUGCAGCUGGAGCGUGGUAGUUAUGUGAAGACUGGAAAGAGAGAGUGGUGUCUUAUGGGAUG  
 KX377337 GCGCUAGAUGAGAGUGUGGAUUUUCCUCUGUGGAGGAUGACGUGUCCCCCAUGAGAGAGAUCAUACUCAAGGUGGUCCUGAUGACCAUCUGUGGCAUGAACCCAAUAGCCAUAACCCUUUGCAGCUGGAGCGUGGUACGUUAUACGUGUAGACUGGAAAGAGAGUGGUGUCUUAUGGGAUG  
 KX369547 GCGCUAGAUGAGAGUGUGGAUUUUCCUCUGUGGAGGAUGACGUGUCCCCCAUGAGAGAGAUCAUACUCAAGGUGGUCCUGAUGACCAUCUGUGGCAUGAACCCAAUAGCCAUAACCCUUUGCAGCUGGAGCGUGGUACGUUAUACGUGUAGACUGGAAAGAGAGUGGUGUCUUAUGGGAUG  
 KX549902 GCGCUAGAUGAGAGUGUGGAUUUUCCUCUGUGGAGGAUGACGUGUCCCCCAUGAGAGAGAUCAUACUCAAGGUGGUCCUGAUGACCAUCUGUGGCAUGAACCCAAUAGCCAUAACCCUUUGCAGCUGGAGCGUGGUACGUUAUACGUGUAGACUGGAAAGAGAGUGGUGUCUUAUGGGAUG  
 KX601166 GCACUAGAUGAGAGUGUGGAUUUUCCUCUGUGGAGGAUGGCCACCCCAUGAGAGAGAUCAUACUCAAGGUGGUCCUGAUGACCAUCUGUGGCAUGAACCCAAUAGCCAUAACCCUUUGCAGCUGGAGCGUGGUAGUUAUGUGAAGACUGGAAAGAGAGAGUGGUGUCUUAUGGGAUG  
 KX601167 GCACUAGAUGAGAGUGUGGAUUUUCCUCUGUGGAGGAUGAUGUCCCCCAUGAGAGAGAUCAUACUCAAGGUGGUCCUGAUGACCAUCUGUGGCAUGAACCCAAUAGCCAUAACCCUUUGCAGCUGGAGCGUGGUAGUUAUGUGAAGACUGGAAAGAGAGAGUGGUGUCUUAUGGGAUG  
 KX601168 GCGCUAGAUGAGAGUGUGGAUUUUCCUCUGUGGAGGAUGACGUGUCCCCCAUGAGAGAGAUCAUACUCAAGGUGGUCCUGAUGACCAUCUGUGGCAUGAACCCAAUAGCCAUAACCCUUUGCAGCUGGAGCGUGGUACGUUAUACGUGUAGACUGGAAAGAGAGAGUGGUGUCUUAUGGGAUG  
 KX766028 GCGCUAGAUGAGAGUGUGGAUUUUCCUCUGUGGAGGAUGACGUGUCCCCCAUGAGAGAGAUCAUACUCAAGGUGGUCCUGAUGACCAUCUGUGGCAUGAACCCAAUAGCCAUAACCCUUUGCAGCUGGAGCGUGGUACGUUAUACGUGUAGACUGGAAAGAGAGAGUGGUGUCUUAUGGGAUG  
 KX766029 GCGCUAGAUGAGAGUGUGGAUUUUCCUCUGUGGAGGAUGACGUGUCCCCCAUGAGAGAGAUCAUACUCAAGGUGGUCCUGAUGACCAUCUGUGGCAUGAACCCAAUAGCCAUAACCCUUUGCAGCUGGAGCGUGGUACGUUAUACGUGUAGACUGGAAAGAGAGAGUGGUGUCUUAUGGGAUG  
 KU940224 GCGCUAGAUGAGAGUGUGGAUUUUCCUCUGUGGAGGAUGACGUGUCCCCCAUGAGAGAGAUCAUACUCAAGGUGGUCCUGAUGACCAUCUGUGGCAUGAACCCAAUAGCCAUAACCCUUUGCAGCUGGAGCGUGGUACGUUAUACGUGUAGACUGGAAAGAGAGAGUGGUGUCUUAUGGGAUG

[illegible]

[illegible][illegible][illegible]

CUGGCAUACCCUGCAGGAGACUCAGGAUCUCGCAUCCUUGAGCAAAAUGGGAGAGGUGAUAGGACUUUAUGGCCAAUUGGGGUCUGAUCAAGAAUGGAGGCUUAUGUUAUGUGCUAUACCCAGGGAAGGAGGAGGAGAGACUCCUGUUGAUGUUUCGAAACCCUGAUGCUGAAGAAGAAGC  
CUGAUUUACCCAGGAGAAUCUAGCAUUCUCAAUCCUAGACAAUGUGGGAGAGUGAUAGGACUUUAUGGCCAAUUGGGGUCUGAUCAAAAUGGAGGCUUAUGUUAUGUGGCCAUACCCAGGGAAGGAGGAGGAGAGACUCCUGUUGAUGUCUUCGAGCCUUCGAGUCUGAUGAAGAAGAAGC  
CUGGAUUACCCAGGAGAAUCUAGCAUUCUCAAUCCUAGACAAUGUGGGAGAGUGAUAGGACUUUAUGGCCAAUUGGGGUCUGAUCAAAAUGGAGGCUUAUGUUAUGUGGCCAUACCCAGGGAAGGAGGAGGAGAGACUCCUGUUGAUGUCUUCGAGCCUUCGAGUCUGAUGAAGAAGAAGC  
CUGGAUUACCCAGGAGAAUCUAGCAUUCUCAAUCCUAGACAAUGUGGGAGAGUGAUAGGACUUUAUGGCCAAUUGGGGUCUGAUCAAAAUGGAGGCUUAUGUUAUGUGGCCAUACCCAGGGAAGGAGGAGGAGAGACUCCUGUUGAUGUCUUCGAGCCUUCGAGUCUGAUGAAGAAGAAGC  
CUGAUUUACCCAGGAGAAUCUAGCAUUCUCAAUCCUAGACAAUGUGGGAGAGUGAUAGGACUUUAUGGCCAAUUGGGGUCUGAUCAAAAUGGAGGCUUAUGUUAUGUGGCCAUACCCAGGGAAGGAGGAGGAGAGACUCCUGUUGAUGUCUUCGAGCCUUCGAGUCUGAUGAAGAAGAAGC  
CUGGAUUACCCAGGAGAAUCUAGCAUUCUCAAUCCUAGACAAUGUGGGAGAGUGAUAGGACUUUAUGGCCAAUUGGGGUCUGAUCAAAAUGGAGGCUUAUGUUAUGUGGCCAUACCCAGGGAAGGAGGAGGAGAGACUCCUGUUGAUGUCUUCGAGCCUUCGAGUCUGAUGAAGAAGAAGC

Sequence

[illegible]

Sequence

XN577536  
 GAGGCGGCGUCGAUUCUUAUGACCGCCACACACACAGCAAGCAACCGGACGAGCAUUCUCCGAGCUUACACUACCAAAUUAUGGACACAGAAAGUGGAAGUCCACAGAGAGAGCCUGAGAGCUCAGGCGUUUGAUGUGGGUGACGGAUCAUUCUGGAAAAACAGUUUGGUUUUUUCCAAGCGUGAGGAAACG  
 KX377333  
 GAGGCGGCGUCGAUUCUUAUGACCGCCACGCCACAGGAACCCGGUGACGCAUUCUCCGAGAUCCAUCUACCAAAUUAUGGACACCGAAUGGGAAGUCCACAGAGAGAGCCUGAGGAGCUCAGGCGUUUGAUGUGGGUGACGGAUCAUUCUGGAAAAACAGUUUGGUUUUUUCCAAGCGUGAGGAAACG  
 KX369547  
 GAGGCGGCGUCGAUUCUUAUGACCGCCACGCCACAGGAACCCGGUGACGCAUUCUCCGAGAUCCAUCUACCAAAUUAUGGACACCGAAUGGGAAGUCCACAGAGAGAGCCUGAGGAGCUCAGGCGUUUGAUGUGGGUGACGGAUCAUUCUGGAAAAACAGUUUGGUUUUUUCCAAGCGUGAGGAAACG  
 KX548902  
 GAGGCGGCGUCGAUUCUUAUGACCGCCACGCCACAGGAACCCGGUGACGCAUUCUCCGAGAUCCAUCUACCAAAUUAUGGACACCGAAUGGGAAGUCCACAGAGAGAGCCUGAGGAGCUCAGGCGUUUGAUGUGGGUGACGGAUCAUUCUGGAAAAACAGUUUGGUUUUUUCCAAGCGUGAGGAAACG  
 KX601166  
 GAGGCGGCGUCGAUUCUUAUGACGUCACACACACAGGAACCCCGGAGCGUUUCUCCGAGAUCCAUCUACCAAAUUAUGGACACAGAAAGUCCACAGAGAGAGCCUGAGGAGCUCAGGCGUUUGAUGUGGGUGACGGAUCAUUCUGGAAAAACAGUUUGGUUUUUUCCAAGCGUGAGGAAACG  
 KX601167  
 GAGGCGGCGUCGAUUCUUAUGACCGCCACACACACAGGAACCCCGGACGCAUUCUCCGAGAUCCAUCUACCAAAUUAUGGACACAGAAUGGGAAGUCCACAGAGAGAGCCUGAGGAGCUCAGGCGUUUGAUGUGGGUGACGGAUCAUUCUGGAAAAACAGUUUGGUUUUUUCCAAGCGUGAGGAAACG



[illegible]

[illegible]

EU545988 CAUCUGCCGGAAUAACCUACACAGAUAGAAAAUGGUGCUUUGAUGGCACGACCAACAACCAUAUUGGAAGACAGUGUGCCGGCAGAGGUGUGGACCAGAUACGGAGAGAAAAAGAGUCUCAAAACCAAGGUGGAUGGACGCCAGAGUUUGUUCAGAUCAUGCGGCCUGAAGUCAUUCAA

[illegible]

[illegible][illegible]

[illegible]

|          |                                                                                                                                                                                              |
|----------|----------------------------------------------------------------------------------------------------------------------------------------------------------------------------------------------|
| KU012532 | AACCAUAGGGAUUCUCAAUGGACAUAUUAUUGCGGGCGCAUCCGCGCUGGGCUAUAUAGCGCGCAUUGACAACUCUUAUACCCGAGCUGUCCAAUAGCGGGUAACCAUCUUAUAACAACAACUACUCCUUAUAGGCGAUGGCCACACAACUGGAGUGUCUUGUUGGCAUGGGCAAAGGGAUG       |
| KU922960 | AACCAUAGGGAUUCUCAAUGGACAUAUUAUAGCCUGCGGGCAGCCUACGCUUGGGCCAUCAUAGUGCGCUUGACAACUUAUUAUUAACCCGAGCGUCCAAUAGCGAGUAGGACCAUCUUAUAACAACAACUACUCCUUAUAGGCGAUGGCCACGCAAGCUGGAGUGUUGUUGUAUUGGCAAAGGGAUG |
| KU922963 | AACCAUAGGGAUUCUCAAUGGACAUAUUAUAGCCUGCGGGCAGCCUACGCUUGGGCCAUCAUAGUGCGCUUGACAACUUAUUAUUAACCCGAGCGUCCAAUAGCGAGUAGGACCAUCUUAUAACAACAACUACUCCUUAUAGGCGAUGGCCACGCAAGCUGGAGUGUUGUUGUAUUGGCAAAGGGAUG |
| KU820898 | AACCAUAGGGAUUCUCAAUGGACAUAUUAUAGCCUGCGGGCAGCCUACGCUUGGGCCAUCAUAGUGCGCUUGACAACUUAUUAUUAACCCGAGCGUCCAAUAGCGAGUAGGACCAUCUUAUAACAACAACUACUCCUUAUAGGCGAUGGCCACGCAAGCUGGAGUGUUGUUGUAUUGGCAAAGGGAUG |
| KU321639 | AACCAUAGGGAUUCUCAAUGGACAUAUUAUAGCCUGCGGGCAGCCUACGCUUGGGCCAUCAUAGUGCGCUUGACAACUUAUUAUUAACCCGAGCGUCCAAUAGCGAGUAGGACCAUCUUAUAACAACAACUACUCCUUAUAGGCGAUGGCCACGCAAGCUGGAGUGUUGUUGUAUUGGCAAAGGGAUG |
| KU820899 | AACCAUAGGGAUUCUCAAUGGACAUAUUAUAGCCUGCGGGCAGCCUACGCUUGGGCCAUCAUAGUGCGCUUGACAACUUAUUAUUAACCCGAGCGUCCAAUAGCGAGUAGGACCAUCUUAUAACAACAACUACUCCUUAUAGGCGAUGGCCACGCAAGCUGGAGUGUUGUUGUAUUGGCAAAGGGAUG |
| KU853012 | AACCAUAGGGAUUCUCAAUGGACAUAUUAUAGCCUGCGGGCAGCCUACGCUUGGGCCAUCAUAGUGCGCUUGACAACUUAUUAUUAACCCGAGCGUCCAAUAGCGAGUAGGACCAUCUUAUAACAACAACUACUCCUUAUAGGCGAUGGCCACGCAAGCUGGAGUGUUGUUGUAUUGGCAAAGGGAUG |
| KU729217 | AACCAUAGGGAUUCUCAAUGGACAUAUUAUAGCCUGCGGGCAGCCUACGCUUGGGCCAUCAUAGUGCGCUUGACAACUUAUUAUUAACCCGAGCGUCCAAUAGCGAGUAGGACCAUCUUAUAACAACAACUACUCCUUAUAGGCGAUGGCCACGCAAGCUGGAGUGUUGUUGUAUUGGCAAAGGGAUG |
| KU729218 | AACCAUAGGGAUUCUCAAUGGACAUAUUAUAGCCUGCGGGCAGCCUACGCUUGGGCCAUCAUAGUGCGCUUGACAACUUAUUAUUAACCCGAGCGUCCAAUAGCGAGUAGGACCAUCUUAUAACAACAACUACUCCUUAUAGGCGAUGGCCACGCAAGCUGGAGUGUUGUUGUAUUGGCAAAGGGAUG |
| KU761564 | AACCAUAGGGAUUCUCAAUGGACAUAUUAUAGCCUGCGGGCAGCCUACGCUUGGGCCAUCAUAGUGCGCUUGACAACUUAUUAUUAACCCGAGCGUCCAAUAGCGAGUAGGACCAUCUUAUAACAACAACUACUCCUUAUAGGCGAUGGCCACGCAAGCUGGAGUGUUGUUGUAUUGGCAAAGGGAUG |
| KU740184 | AACCAUAGGGAUUCUCAAUGGACAUAUUAUAGCCUGCGGGCAGCCUACGCUUGGGCCAUCAUAGUGCGCUUGACAACUUAUUAUUAACCCGAGCGUCCAAUAGCGAGUAGGACCAUCUUAUAACAACAACUACUCCUUAUAGGCGAUGGCCACGCAAGCUGGAGUGUUGUUGUAUUGGCAAAGGGAUG |
| KU744693 | AACCAUAGGGAUUCUCAAUGGACAUAUUAUAGCCUGCGGGCAGCCUACGCUUGGGCCAUCAUAGUGCGCUUGACAACUUAUUAUUAACCCGAGCGUCCAAUAGCGAGUAGGACCAUCUUAUAACAACAACUACUCCUUAUAGGCGAUGGCCACGCAAGCUGGAGUGUUGUUGUAUUGGCAAAGGGAUG |
| KU497555 | AACCAUAGGGAUUCUCAAUGGACAUAUUAUAGCCUGCGGGCAGCCUACGCUUGGGCCAUCAUAGUGCGCUUGACAACUUAUUAUUAACCCGAGCGUCCAAUAGCGAGUAGGACCAUCUUAUAACAACAACUACUCCUUAUAGGCGAUGGCCACGCAAGCUGGAGUGUUGUUGUAUUGGCAAAGGGAUG |
| KU527068 | AACCAUAGGGAUUCUCAAUGGACAUAUUAUAGCCUGCGGGCAGCCUACGCUUGGGCCAUCAUAGUGCGCUUGACAACUUAUUAUUAACCCGAGCGUCCAAUAGCGAGUAGGACCAUCUUAUAACAACAACUACUCCUUAUAGGCGAUGGCCACGCAAGCUGGAGUGUUGUUGUAUUGGCAAAGGGAUG |

[illegible]

[illegible]

[illegible]

[illegible]

[illegible]

[illegible]

[illegible]



[illegible]

[illegible]

[illegible]

[illegible]

[illegible]

[illegible][illegible]

[illegible][illegible]

KU866423  
KX377336  
KX377337  
KX369547  
KX548902  
KX601166  
KX601167  
KX601168  
KX766028  
KX766029  
KU940224

CACCUGGGCUGAGAACAUUAAAAACACAGUCAACAUGGUGCGCAGGAUCAUAGGUGAUGAAGAAAAGUACAUGGACUACCUAUCCACCCAAGUUCGCUACUUGGGUGAAGAAGGGUCUACACCUGGAGUGCUGUAA  
UACUUGGGCUGAGAACAUUAAAGACACAGUCAACAUGGUGCGCAGGAUCAUAGGUGAUGAAGAAAAGUACAUGGACUACCUAUCCACUCAAGUUCGCUACUUGGGUGAAGAAGGGUCCACACCUGGAGUGUUAUAA  
CACCUGGGCUGAGAACAUUAAAAACACAGUCAACAUGGUGCGCAGGAUCAUAGGUGAUGAAGAAAAGUACAUGGACUACCUAUCCACCCAAGUUCGCUACUUGGGUGAAGAAGGGUCUACACCUGGAGUGCUGUAA  
CACCUGGGCUGAGAACAUUAAAAACACAGUCAACAUGGUGCGCAGGAUCAUAGGUGAUGAAGAAAAGUACAUGGACUACCUAUCCACCCAAGUUCGCUACUUGGGUGAAGAAGGGUCUACACCUGGAGUGCUGUAA  
CACUUGGGCUGAGAACAUCAAAGACACAGUCAACAUGGUGCGUAGGAUCAUAGGUGAUGAAGAAAAGUACAUGGACUACCUAUCCACCCAAGUACGCUACUUGGGUGAGGAAGGGUCCACACCUGGAGUGCUGUAA  
UACUUGGGCUGAGAACAUUAAAGACACAGUCAACAUGGUGCGCAGGAUCAUAGGUGAUGAAGAAAAGUACAUGGACUACCUAUCCACUCAAGUUCGCUACUUGGGUGAAGAAGGGUCCACACCUGGAGUGUUAUAA  
CACCUGGGCUGAGAACAUUAAAAACACAGUCAACAUGGUGCGCAGGAUCAUAGGUGAUGAAGAAAAGUACAUGGACUACCUAUCCACCCAAGUUCGCUACUUGGGUGAAGAAGGGUCUACACCUGGAGUGCUGUAA  
CACCUGGGCUGAGAACAUUAAAAACACAGUCAACAUGGUGCGCAGGAUCAUAGGUGAUGAAGAAAAGUACAUGGACUACCUAUCCACCCAAGUUCGCUACUUGGGUGAAGAAGGGUCUACACCUGGAGUGCUGUAA  
CACCUGGGCUGAGAACAUUAAAAACACAGUCAACAUGGUGCGCAGGAUCAUAGGUGAUGAAGAAAAGUACAUGGACUACCUAUCCACCCAAGUUCGCUACUUGGGUGAAGAAGGGUCUACACCUGGAGUGCUGUAA  
CACCUGGGCUGAGAACAUUAAAAACACAGUCAACAUGGUGCGCAGGAUCAUAGGUGAUGAAGAAAAGUACAUGGACUACCUAUCCACCCAAGUUCGCUACUUGGGUGAAGAAGGGUCUACACCUGGAGUGCUGUAA
